# Supplementary material for: High-performance oxide thin-film diode and its conduction mechanism based on ALD-assisted interface engineering
Source: Royal Society of Chemistry journal article supplement (doi:10.1039/d2tc03751c), 2022-12-21
Supplement: d2tc03751c1.pdf [file d2tc03751c1.pdf]

## Supplementary Information

### High performance oxide thin-film diode and its conduction mechanism based on ALD-assisted interface engineering

*Hye-In Yeom,<sup>a</sup> Jingyu Kim,<sup>a</sup> Guk-Jin Jeon,<sup>a</sup> Jeongwoo Park,<sup>b</sup> Dong Uk Han,<sup>a</sup> Joohyeong Kim,<sup>a</sup> Kyung Min Kim,<sup>a</sup> Bonggeun Shong<sup>b</sup> and Sang-Hee Ko Park<sup>a,\*</sup>*

<sup>a</sup>Department of Materials Science and Engineering, Korea Advanced Institute of Science and Technology (KAIST), 291 Daehak-ro, Yuseong-gu, Daejeon, 34141, Republic of Korea

<sup>b</sup>Department of Chemical Engineering, Hongik University, 94 Wausan-ro, Mapo-gu, Seoul 04066, Republic of Korea

| Conduction mechanism      | Equation                                                                                                                                                                                                                                     |
|---------------------------|----------------------------------------------------------------------------------------------------------------------------------------------------------------------------------------------------------------------------------------------|
| Thermionic emission       | $J = A^* T^2 \exp\left(\frac{q\Phi_B - \Delta E}{k_B T}\right)$                                                                                                                                                                              |
| Fowler-Nordheim tunneling | $J_{FN} = \frac{\alpha(\beta V)^2 A}{\Phi_B d^2} \exp\left(-\frac{bd\Phi_B^{3/2}}{\beta V}\right)$ $\ln(J/V^2) \propto K_1 1/V$                                                                                                              |
| Ohmic conduction          | $J = q\mu n_0 V$ $J \propto V$                                                                                                                                                                                                               |
| Poole-Frenkel emission    | $J = q\mu N_c E \left[ \frac{-q(\Phi T - \sqrt{qE/\pi\epsilon_i\epsilon_0})}{kT} \right]$ $\ln(J/V) = \sqrt{V}$                                                                                                                              |
| Trap-free-SCLC            | $J = \frac{9}{8} \mu_e \epsilon_0 \epsilon_s \frac{V^2}{d^3}$ $J \propto V^2$                                                                                                                                                                |
| Trap-limited SCLC         | $J_{SCLC} = \sigma_0$ $\left\{ \frac{\epsilon_0 \epsilon_i l \sin\left(\frac{\pi}{l}\right) l^4}{q(l+1)B_c(2\alpha)^3} \right\}^l \left(\frac{2l+1}{l+1}\right)^{l+1} \left(\frac{1}{d}\right)^{2l+1} V^{l+1}$ $\log(J) \propto K_2 \log(V)$ |

**Table S1.** Equations for electronic conduction mechanisms in dielectric film.

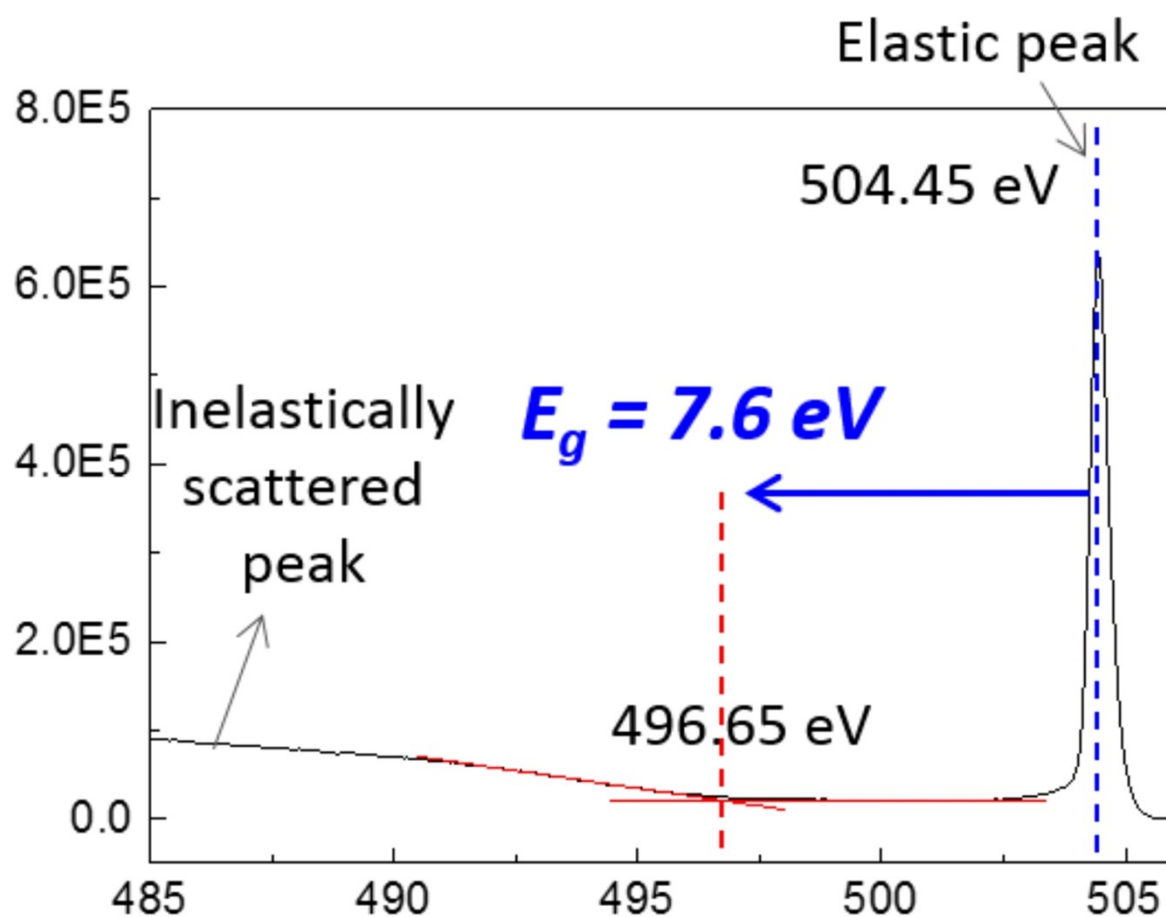

**Figure. S1.** Reflection electron energy loss spectroscopy (REELS) analysis of  $\text{Al}_2\text{O}_3$ . The calculated energy band gap is 7.6 eV.

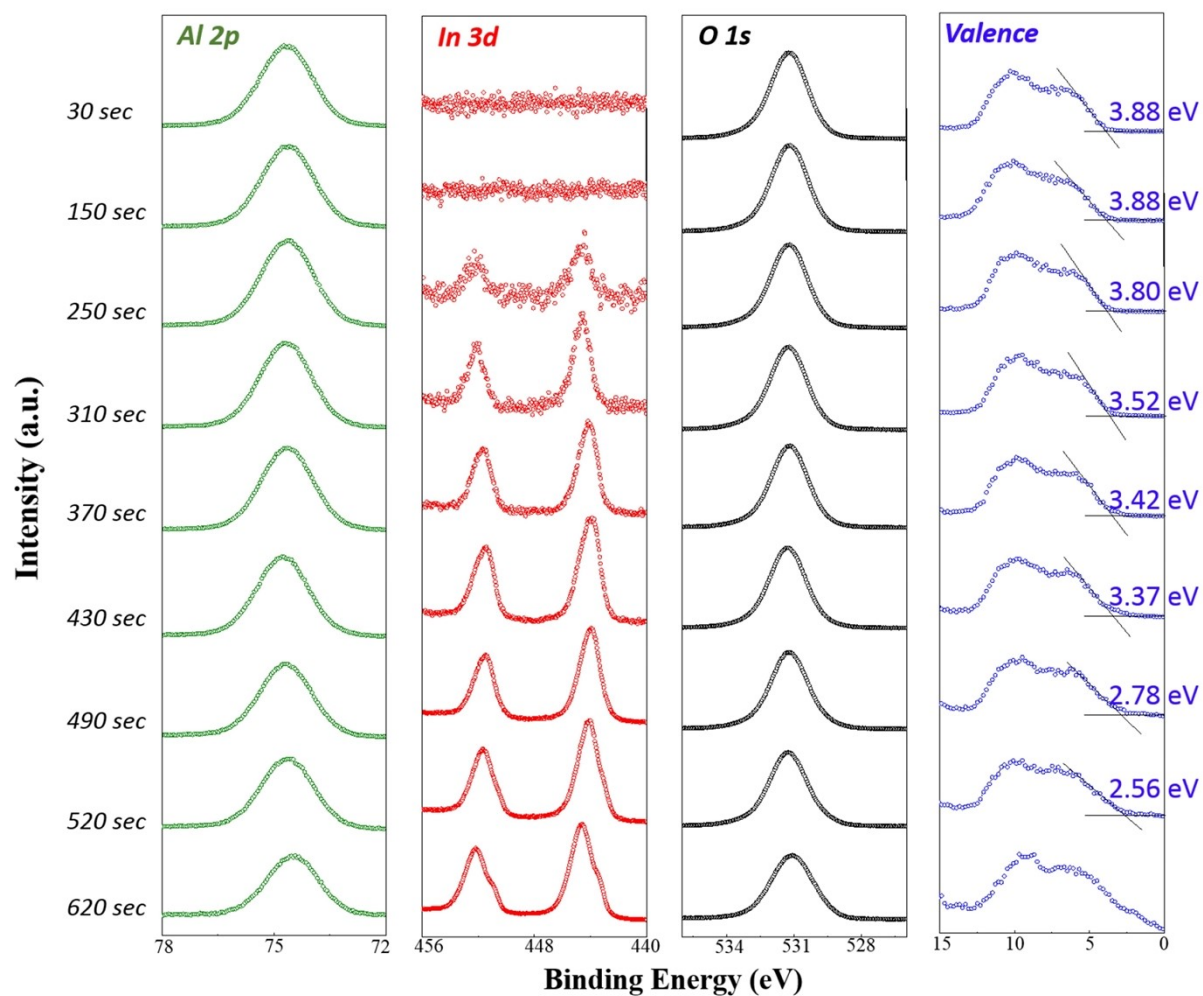

**Figure. S2.** Al 2p, In 3d, O 1s, and valence spectra for the IA (3nm-InO<sub>x</sub>/20nm-Al<sub>2</sub>O<sub>3</sub>) stack as a function of sputter time for depth profile in X-ray photoelectron spectroscopy (XPS) analysis.

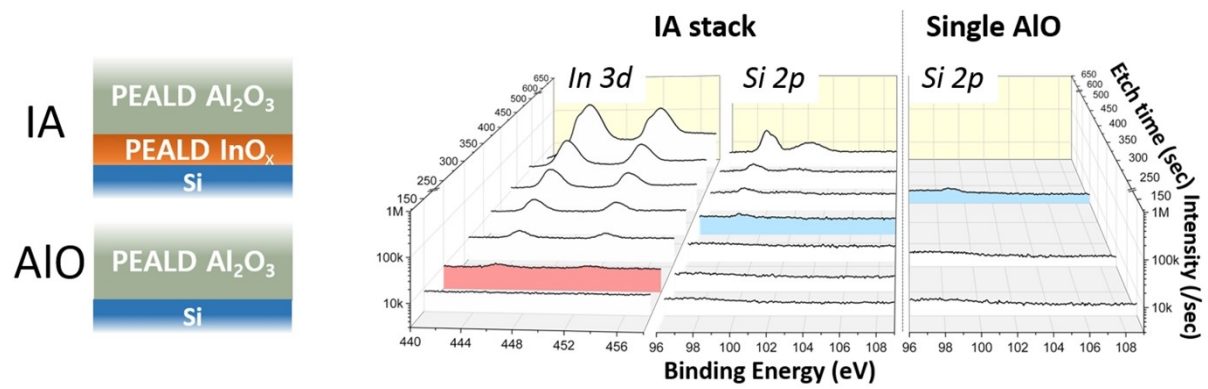

**Figure. S3.** X-ray photoelectron spectroscopy (XPS) depth profile of In 3d and Si 2p in IA (3nm- $\text{InO}_x$ /20nm- $\text{Al}_2\text{O}_3$ ) stack, and Si 2p in 20nm- $\text{Al}_2\text{O}_3$  film on Si wafer.

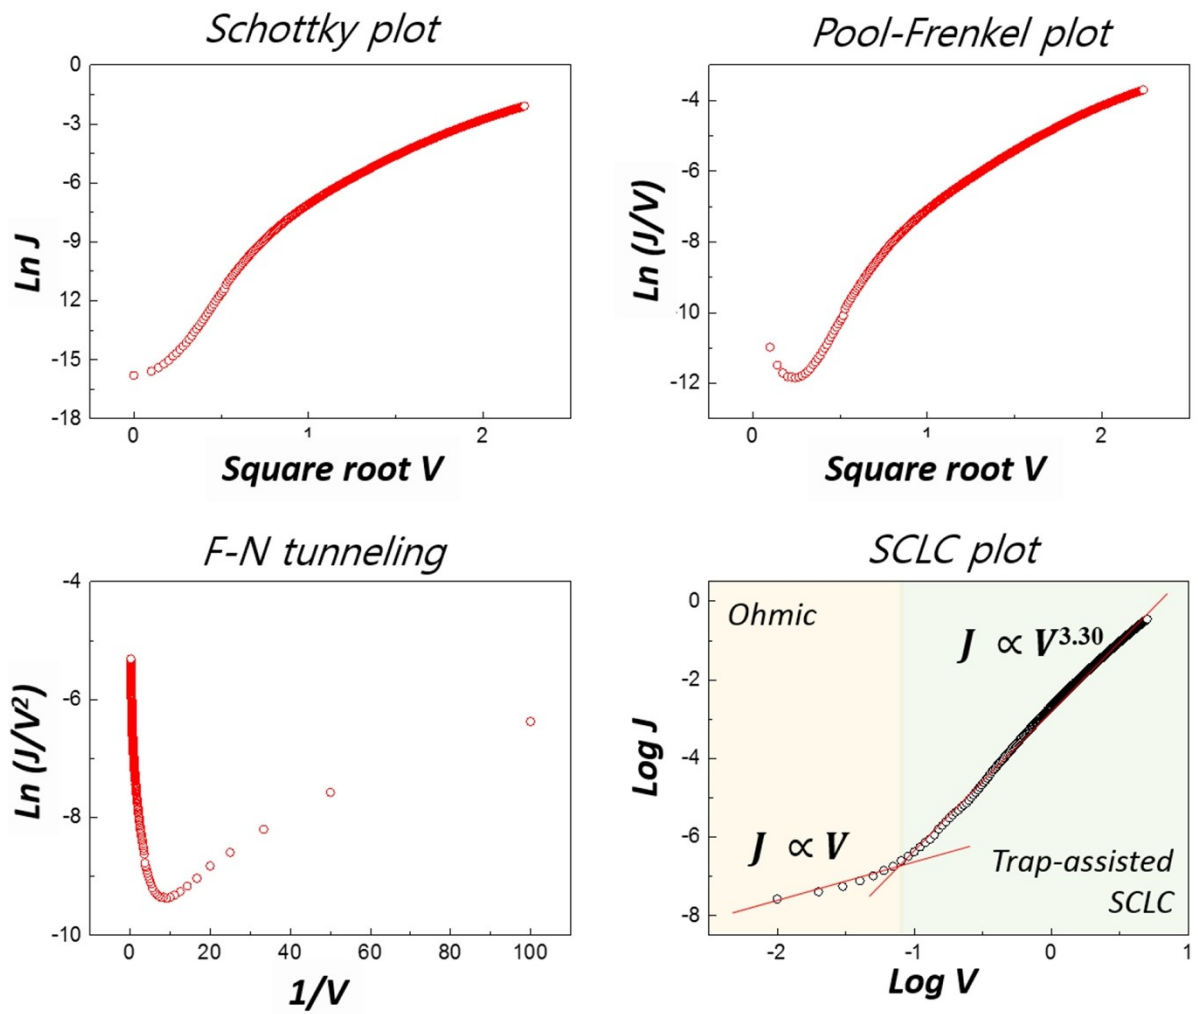

**Figure S4.** Fitting with various conduction models of the MSIM diode.

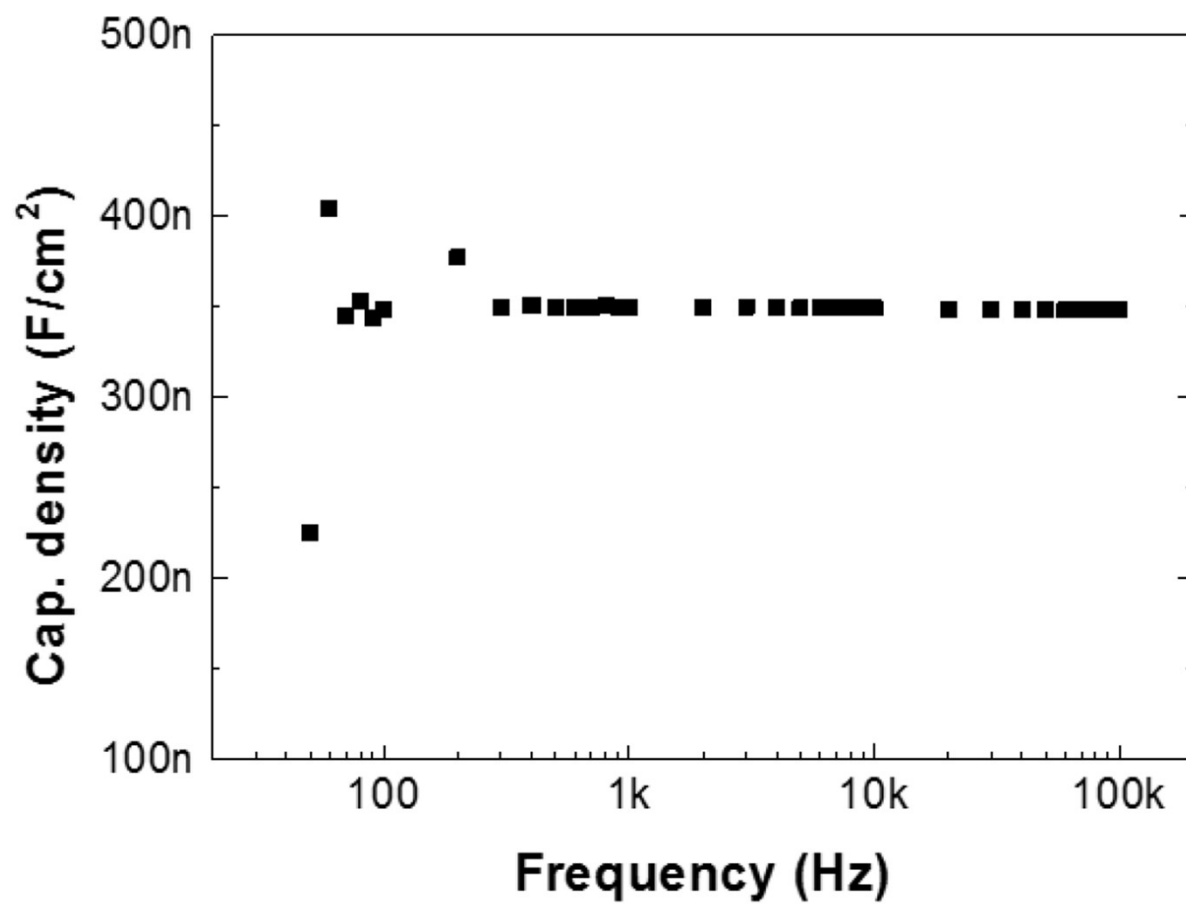

**Figure S5.** Capacitance–frequency curve of Al<sub>2</sub>O<sub>3</sub> at applied DC voltage of –1V.

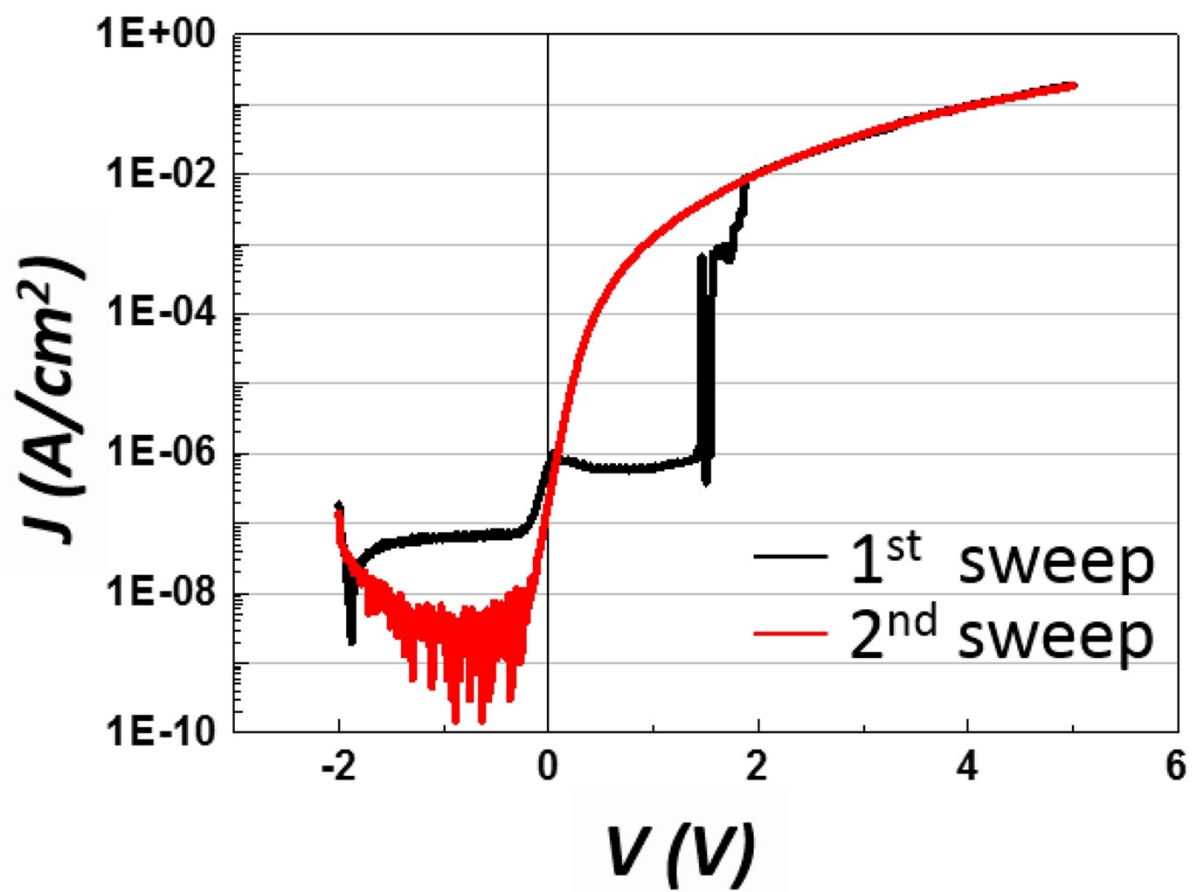

**Figure S6.** Wake-up effect of the MSIM diode. After the first sweep, the diode exhibited good rectifying characteristics.



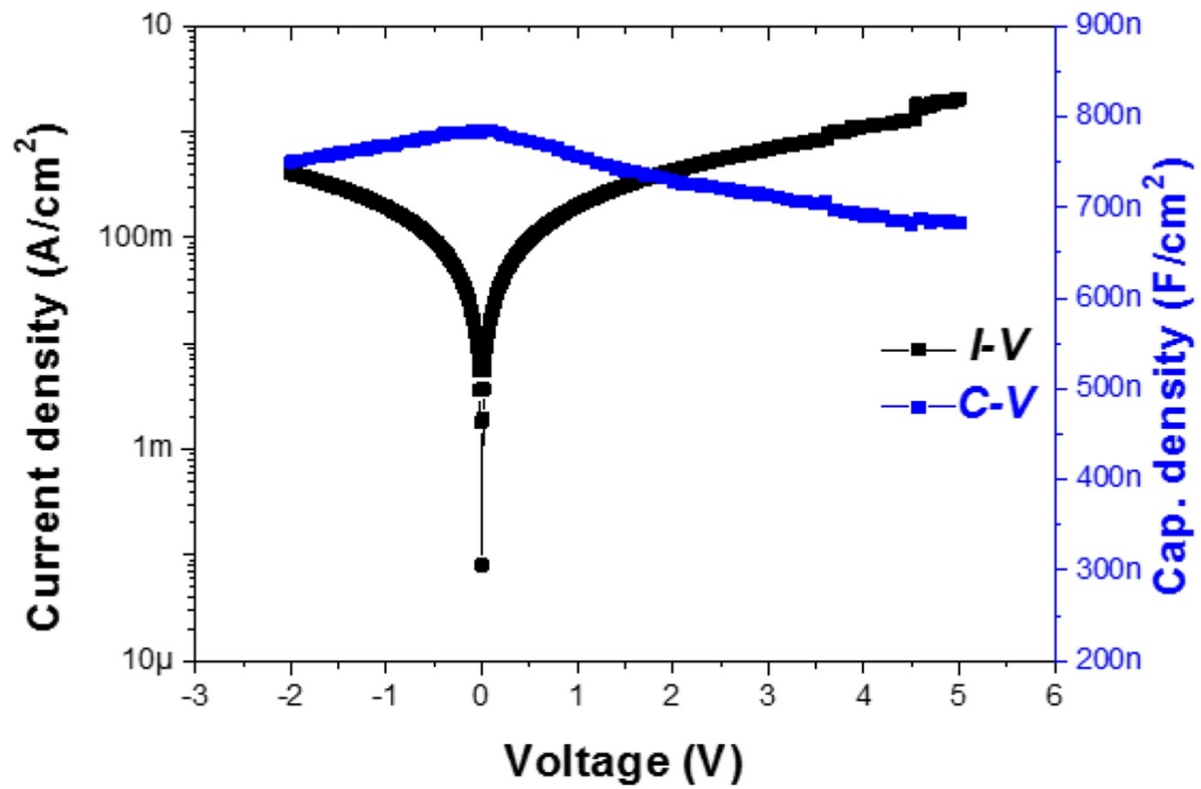

**Figure S7.**  $I$ - $V$  characteristics of the MSIM diode using  $\text{Al}_2\text{O}_3$  by thermal-atomic layer deposition (ALD).
